# Supplementary material for: Metabolic Modifications in Terpenoid and Steroid Pathways Triggered by Methyl Jasmonate in Taxus × media Hairy Roots
Source: MDPI journal article supplement (doi:10.3390/plants11091120), 2022-04-20
Supplement: s1 [file s1]

# Metabolic Modifications in Terpenoid and Steroid Pathways Triggered by Methyl Jasmonate in *Taxus x media* Hairy Roots

**Table S1.** GC-MS data (retention times and characteristic ions of mass spectra) of identified steroids and triterpenoids.

| Compound<br>(peak number)   | Formula                                        | Molecular<br>weight | Retention<br>time<br>[min] | Mass spectrum<br><i>m/z</i><br>(relative intensity)                                                        |
|-----------------------------|------------------------------------------------|---------------------|----------------------------|------------------------------------------------------------------------------------------------------------|
| cholesterol (1)             | C <sub>27</sub> H <sub>46</sub> O              | 386.6               | 31.06                      | 386 (26), 107 (50), 105 (48), 91 (57), 81 (54), 79 (46), 69 (47), 57 (87), 55 (73), 43 (100), 41 (55)      |
| campesterol (2)             | C <sub>28</sub> H <sub>48</sub> O              | 400.6               | 33.74                      | 400 (30), 107 (51), 105 (55), 95 (49), 83 (45), 81 (64), 71 (62), 57 (77), 55 (77), 43 (100), 41 (52)      |
| stigmasterol (3)            | C <sub>29</sub> H <sub>48</sub> O              | 412.6               | 34.52                      | 412 (36), 145 (64), 107 (52), 95 (100), 83 (66), 81 (90), 78 (60), 69 (67), 67 (85), 55 (69)               |
| sitosterol (4)              | C <sub>29</sub> H <sub>50</sub> O              | 414.7               | 36.42                      | 414 (29), 145 (54), 107 (59), 105 (60), 95 (54), 91 (49), 81 (57), 57 (68), 55 (70), 43 (100)              |
| isofucosterol (5)           | C <sub>29</sub> H <sub>48</sub> O              | 412.3               | 36.78                      | 412 (5), 314 (100), 105 (47), 95 (50), 91 (42), 83 (40), 81 (51), 69 (61), 55 (96), 43 (49)                |
| β-amyrin                    | C <sub>30</sub> H <sub>50</sub> O              | 426.7               | 37.35                      | 426 (27), 219 (18), 218 (100), 203 (49), 189 (17), 135 (11), 109 (13), 105 (12), 95 (15), 81 (18), 69 (14) |
| 5-campestenenone (6)        | C <sub>28</sub> H <sub>46</sub> O              | 398.7               | 37.59                      | 398 (27), 314 (26), 229 (49), 135 (20), 124 (100), 107 (21), 95 (29), 91 (22), 55 (38)                     |
| α-amyrin                    | C <sub>30</sub> H <sub>50</sub> O              | 426.7               | 38.60                      | 426 (4), 219 (18), 218 (100), 203 (20), 189 (19), 135 (17), 133 (15), 122 (16), 119 (15), 95 (16)          |
| tremulone (7)               | C <sub>29</sub> H <sub>46</sub> O              | 410.7               | 39.3                       | 410 (32), 187 (27), 174 (100), 161 (37), 159 (26), 91 (28), 57 (28), 55 (37), 43 (44), 41 (28)             |
| 4-stigmasten-3-one (8)      | C <sub>29</sub> H <sub>48</sub> O              | 412.7               | 40.89                      | 412 (37), 229 (34), 218 (31), 124 (100), 109 (31), 95 (41), 81 (27), 69 (32), 55 (37), 43 (44)             |
| oleanolic acid methyl ester | C <sub>31</sub> H <sub>50</sub> O <sub>3</sub> | 470.1               | 46.37                      | 470 (1), 262 (48), 207 (13), 204 (16), 203 (100), 202 (21), 189 (22), 133 (17), 119 (13), 105 (14)         |
| stigmastane-3,6-dione (9)   | C <sub>29</sub> H <sub>48</sub> O <sub>2</sub> | 428.6               | 48.02                      | 428 (25), 135 (61), 107 (74), 98 (63), 95 (67), 79 (62), 69 (86), 57 (67), 55 (100), 43 (77), 41 (71)      |
| ursolic acid methyl ester   | C <sub>31</sub> H <sub>50</sub> O <sub>3</sub> | 470.1               | 48.96                      | 470 (1), 263 (20), 262 (100), 207 (32), 203 (93), 189 (29), 133 (76), 119 (34), 105 (21), 95 (18)          |

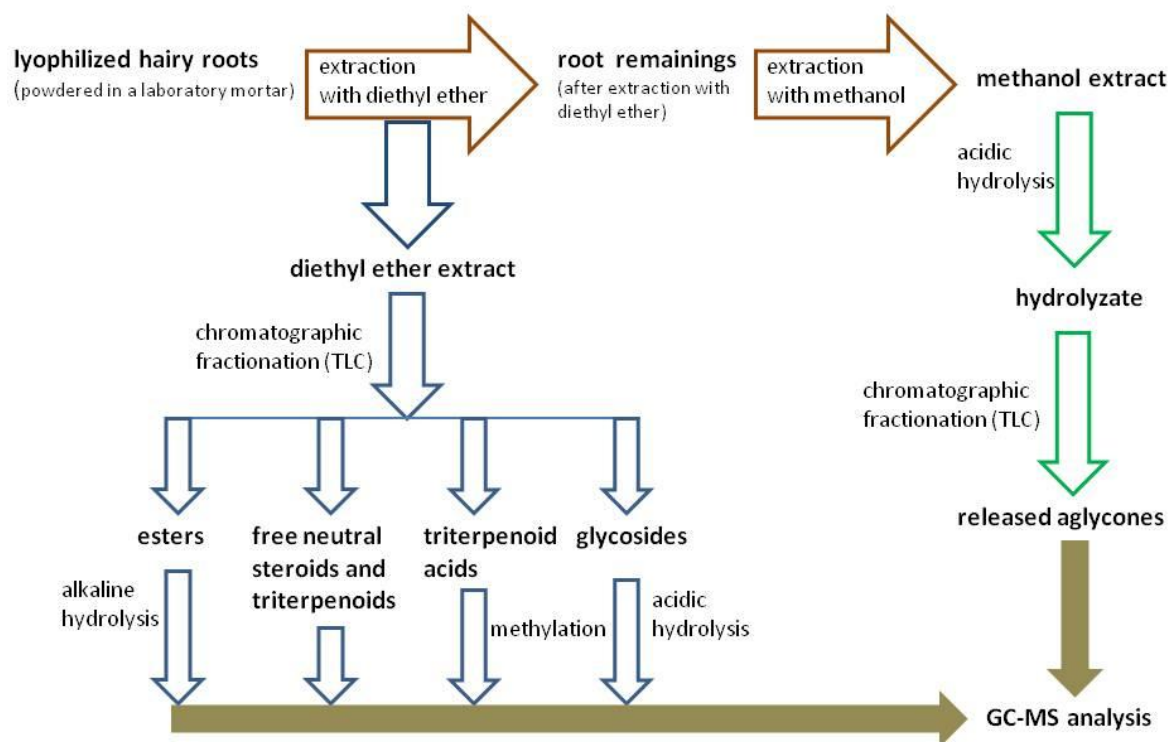

**Figure S1.** The general scheme of the experimental procedure related to the extraction, separation and analysis of steroids and triterpenoids in *T. x media* hairy roots.
